# Supplementary material for: Cyclodextrin mediated polymer coupling via thiol–maleimide conjugation: facile access to functionalizable hydrogels
Source: Royal Society of Chemistry journal article supplement (doi:10.1039/c4ra12408a), 2014-01-01
Supplement: c4ra12408a1.pdf [file c4ra12408a1.pdf]

## SUPPORTING INFORMATION

### Cyclodextrin mediated polymer coupling via thiol-maleimide conjugation: facile access to functionalizable hydrogels

M. Arslan,<sup>a</sup> T. N. Gevrek,<sup>a</sup> A. Sanyal<sup>\*a,b</sup> and R. Sanyal<sup>\*a,b</sup>

<sup>a</sup>Department of Chemistry, Bogazici University, Bebek, Istanbul 34342 Turkey

<sup>b</sup>Center for Life Sciences & Technologies Bogazici University, Istanbul 34342, Turkey

#### List of Figures:

1. **Scheme S1.** Synthesis of maleimide end functionalized PEGs (PEG-*bm*).
2. **Figure S1.** TGA thermograms of PEG 2K-*bm* polymer before and after rDA reaction. Comparison of 2K, 6K and 10 K polymers in terms of weight loss.
3. **Figure S2.** <sup>1</sup>H NMR spectrum of PEG 6K-*bm* polymer before rDA reaction.
4. **Figure S3.** <sup>1</sup>H NMR spectrum of PEG 6K-*bm* polymer after rDA reaction.

**Typical Synthesis of Bis-acid 2K PEG:** Anhydrous PEG (2 g, 1 mmol) prepared by azeotropic evaporation of toluene was dissolved in THF (5 mL) and triethylamine (0.42 mL, 2.99 mmol) was added at 0 °C. Succinic anhydride (0.34 g, 3.42 mmol) and DMAP (0.05 g, 0.40 mmol) were dissolved in THF (5 mL) in a separate round bottom flask and the mixture was slowly added to the PEG solution at 0 °C in a drop wise fashion. The solution was stirred for 20 h under N<sub>2</sub>. The reaction mixture was concentrated *in vacuo*, dissolved in minimal amount of CH<sub>2</sub>Cl<sub>2</sub> and precipitated in cold diethyl ether twice to give pure bis-acid PEG as a white solid (2.13 g, 97% yield) that was used directly in the next step. Similar protocol was used to obtain PEG-diacids from PEG-diols with different molecular weights.

**Synthesis of Protected Bismaleimide PEGs:** A flask equipped with a magnetic stirrer was charged with PEG 6K diacid (0.48 mmol, 3 g), protected maleimide containing alcohol (1.44 mmol, 320.0 mg), EDCI (1.05 mmol, 202.0 mg) and DMAP (0.096 mmol, 11.0 mg). A 10 ml portion of anhydrous CH<sub>2</sub>Cl<sub>2</sub> was then added to reaction vessel and mixture was stirred overnight at room temperature under N<sub>2</sub> atmosphere. After reaction completed more CH<sub>2</sub>Cl<sub>2</sub> was added and mixture was extracted with 30 ml saturated NaHCO<sub>3</sub> solution. The organic layer collected and dried over Na<sub>2</sub>SO<sub>4</sub>. After filtering, solvent was removed under reduced pressure. Then, the polymer was dissolved in minimum amount of CH<sub>2</sub>Cl<sub>2</sub> and precipitated by pouring into cold anhydrous ether. The precipitate was then filtered and dried *in vacuo* (71 % yield).

<sup>1</sup>HNMR (CDCl<sub>3</sub>, δ, ppm) 6.50 (s, 4H, CH=CH), 5.24 (s, 4H, CH bridgehead protons), 4.23 (t, 4H, *J* = 4.7 Hz, OCH<sub>2</sub>), 4.04 (t, 4H, *J* = 5.8 Hz, NCH<sub>2</sub>), 3.82–3.42 (m, 4H, OCH<sub>2</sub>CH<sub>2</sub> of PEG), 2.83 (s, 4H, CH-CH bridge protons), 2.68–2.58 (m, 8H, CH<sub>2</sub>C=O), 1.90 (tt, 4H, *J* = 5.8, 4.6 Hz, NCH<sub>2</sub>CH<sub>2</sub>CH<sub>2</sub>O).

**Activation of the Protected Maleimide Groups:** Deprotection of maleimide groups were carried out by heating polymers at 110 °C in anhydrous toluene for 12 h. Solvent was evaporated to obtain the polymers in quantitative manner. Thermogravimetric analysis (TGA) of deprotected polymers shows that removal of furan group was achieved quantitatively (Figure S1).

<sup>1</sup>HNMR (CDCl<sub>3</sub>, δ, ppm) 6.69 (s, 4H, CH=CH), 4.23 (t, 4H, *J* = 4.8 Hz, OCH<sub>2</sub>), 4.06 (t, 2H, *J* = 5.7 Hz, NCH<sub>2</sub>), 3.83–3.41 (m, 4H x *m*, OCH<sub>2</sub>CH<sub>2</sub> of PEG), 2.67–2.57 (m, 8H, CH<sub>2</sub>C=O), 1.93 (tt, 2H, *J* = 5.6, 4.7 Hz, NCH<sub>2</sub>CH<sub>2</sub>CH<sub>2</sub>O).

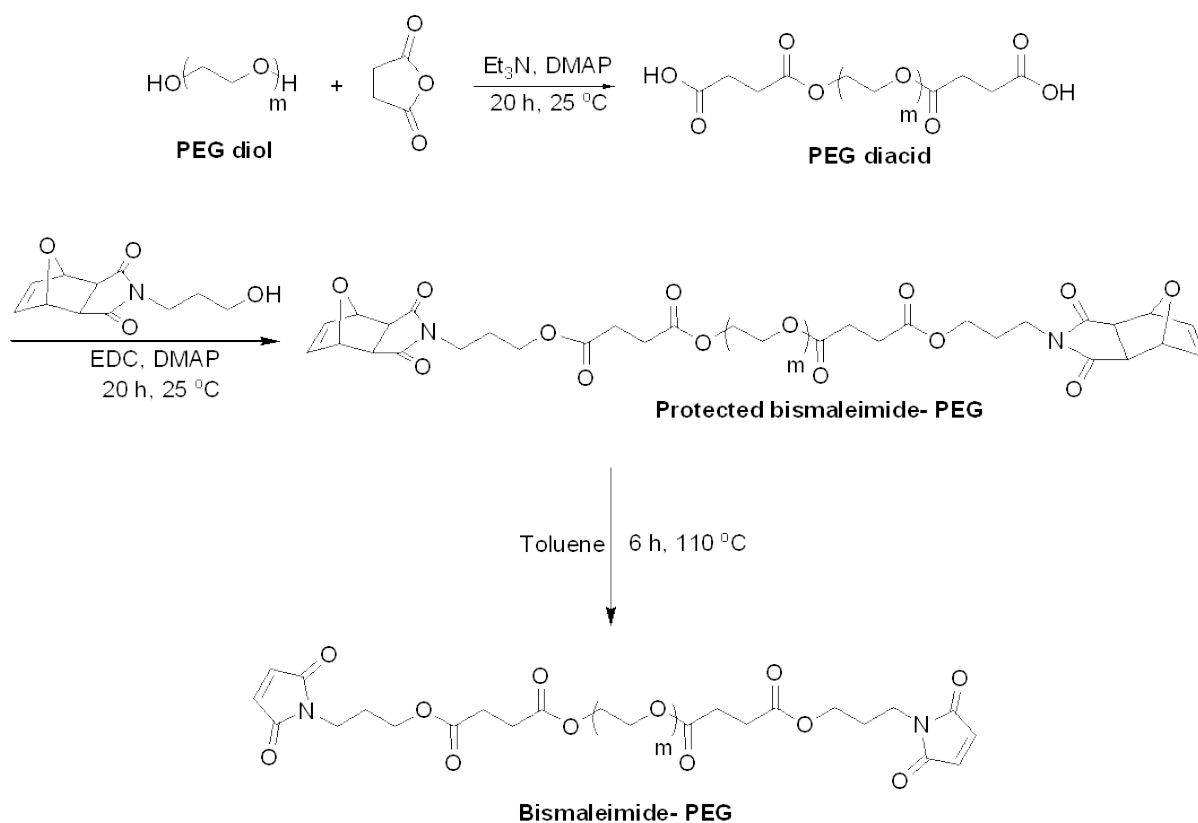

**Scheme S1.** Synthesis of maleimide end functionalized PEGs (PEG-*bm*).

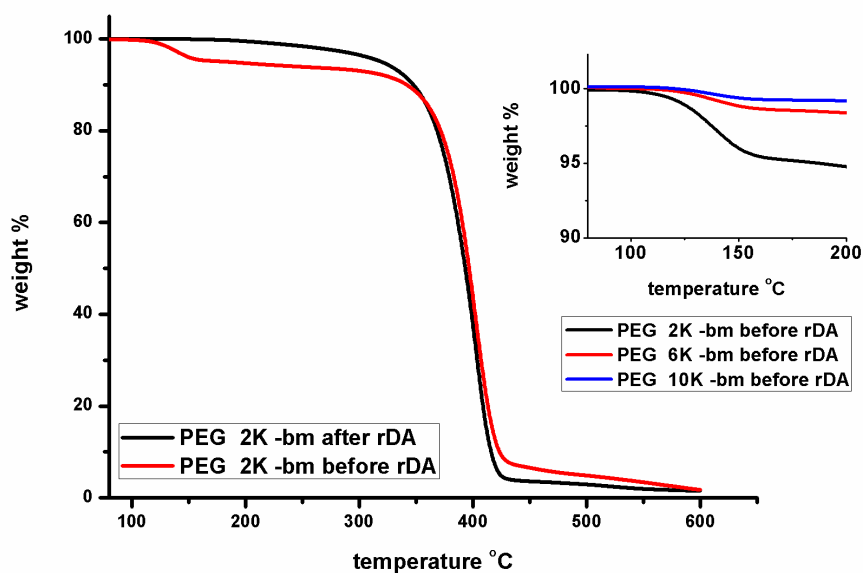

**Figure S1.** TGA thermograms of PEG 2K-*bm* polymer before and after rDA reaction. Upper thermogram shows the comparison of 2K, 6K and 10 K polymers in terms of weight loss.

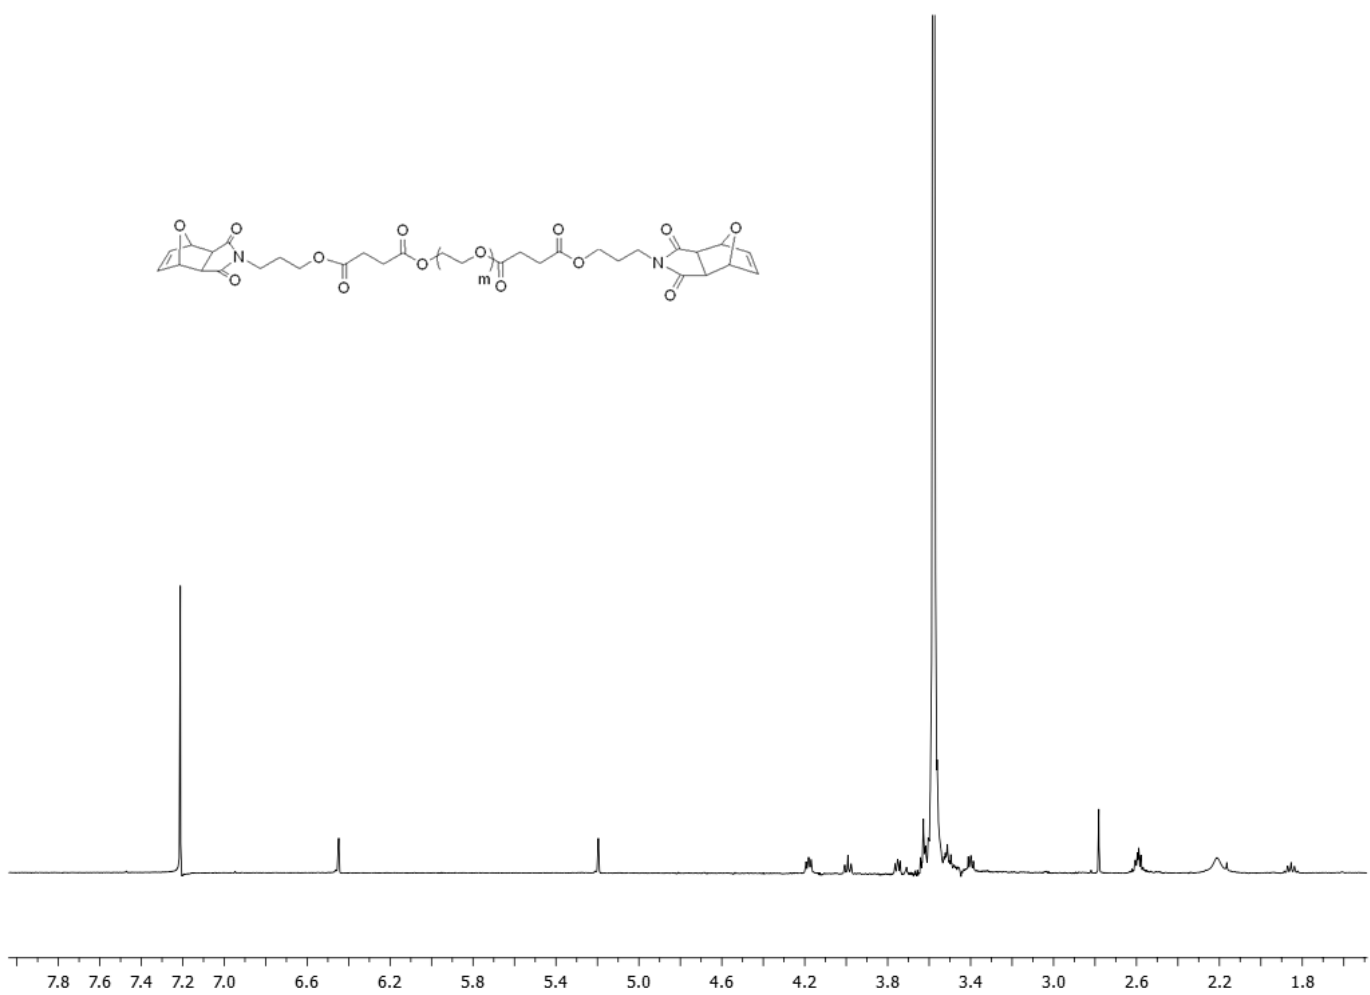

**Figure S2.** <sup>1</sup>H NMR spectrum of PEG 6K-*bm* polymer before rDA reaction.

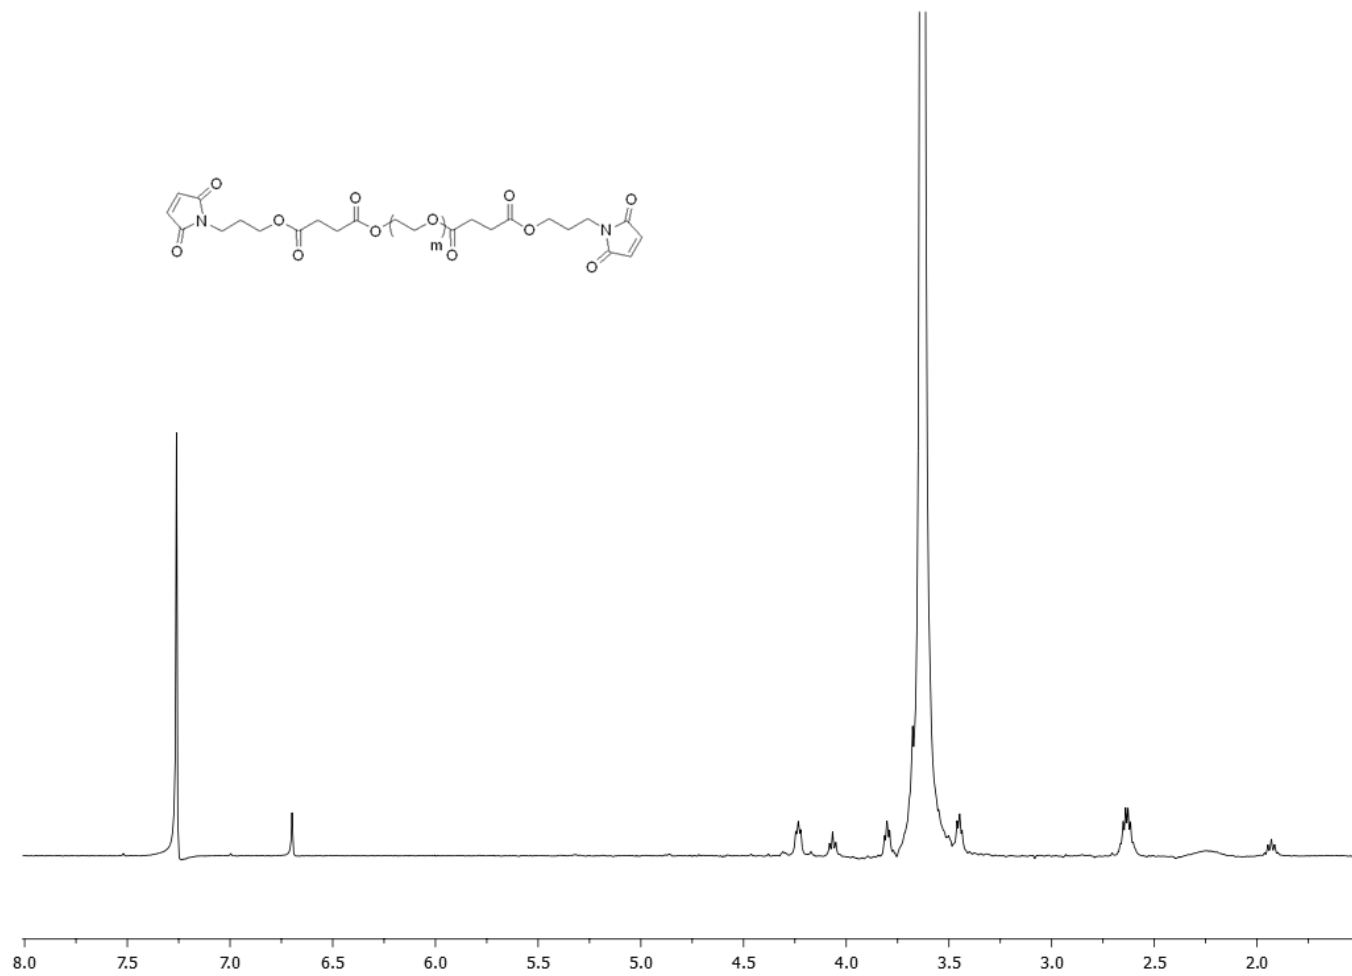

**Figure S3.** <sup>1</sup>H NMR spectrum of PEG 6K-*bm* polymer after rDA reaction.
